# Supplementary material for: Kinetic Modeling and Graphical Analysis of 18F-Fluoromethylcholine (FCho), 18F-Fluoroethyltyrosine (FET) and 18F-Fluorodeoxyglucose (FDG) PET for the Fiscrimination between High-Grade Glioma and Radiation Necrosis in Rats
Source: PLOS journal article supplement (doi:10.1371/journal.pone.0161845), 2016-08-25
Supplement: S2 (10.1371/journal.pone.0161845.s002) [file journal.pone.0161845.s002]

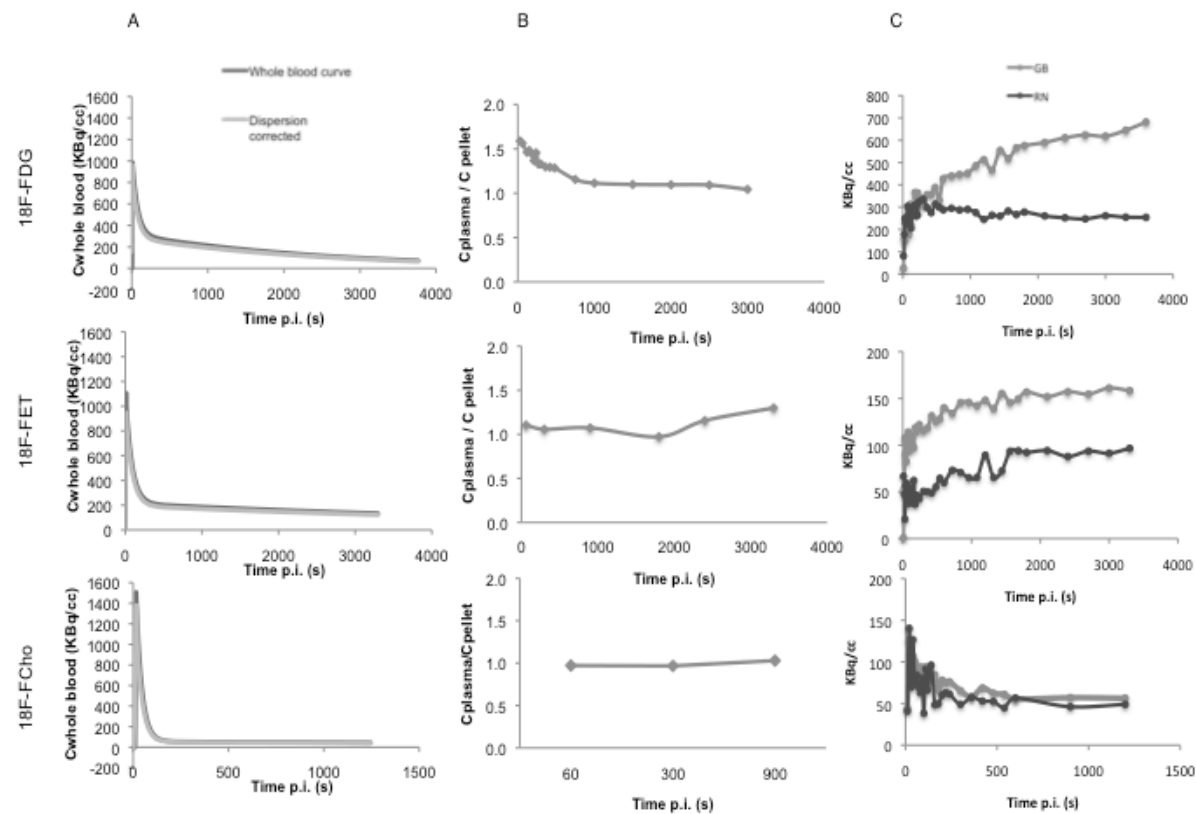

**S2 Fig. Blood curves and time activity curves.** Whole blood and dispersion corrected blood curve (A), plasma-blood ratios (B) and time activity curves (TACs) (C) of 18F-FDG, 18F-FET and 18F-FCho in GB and RN.
